# Supplementary material for: Polyoxometalate-based organic–inorganic hybrid compounds containing transition metal mixed-organic-ligand complexes of N-containing and pyridinecarboxylate ligands
Source: Royal Society of Chemistry journal article supplement (doi:10.1039/c5dt00201j), 2015-01-01
Supplement: c5dt00201j1.pdf [file c5dt00201j1.pdf]

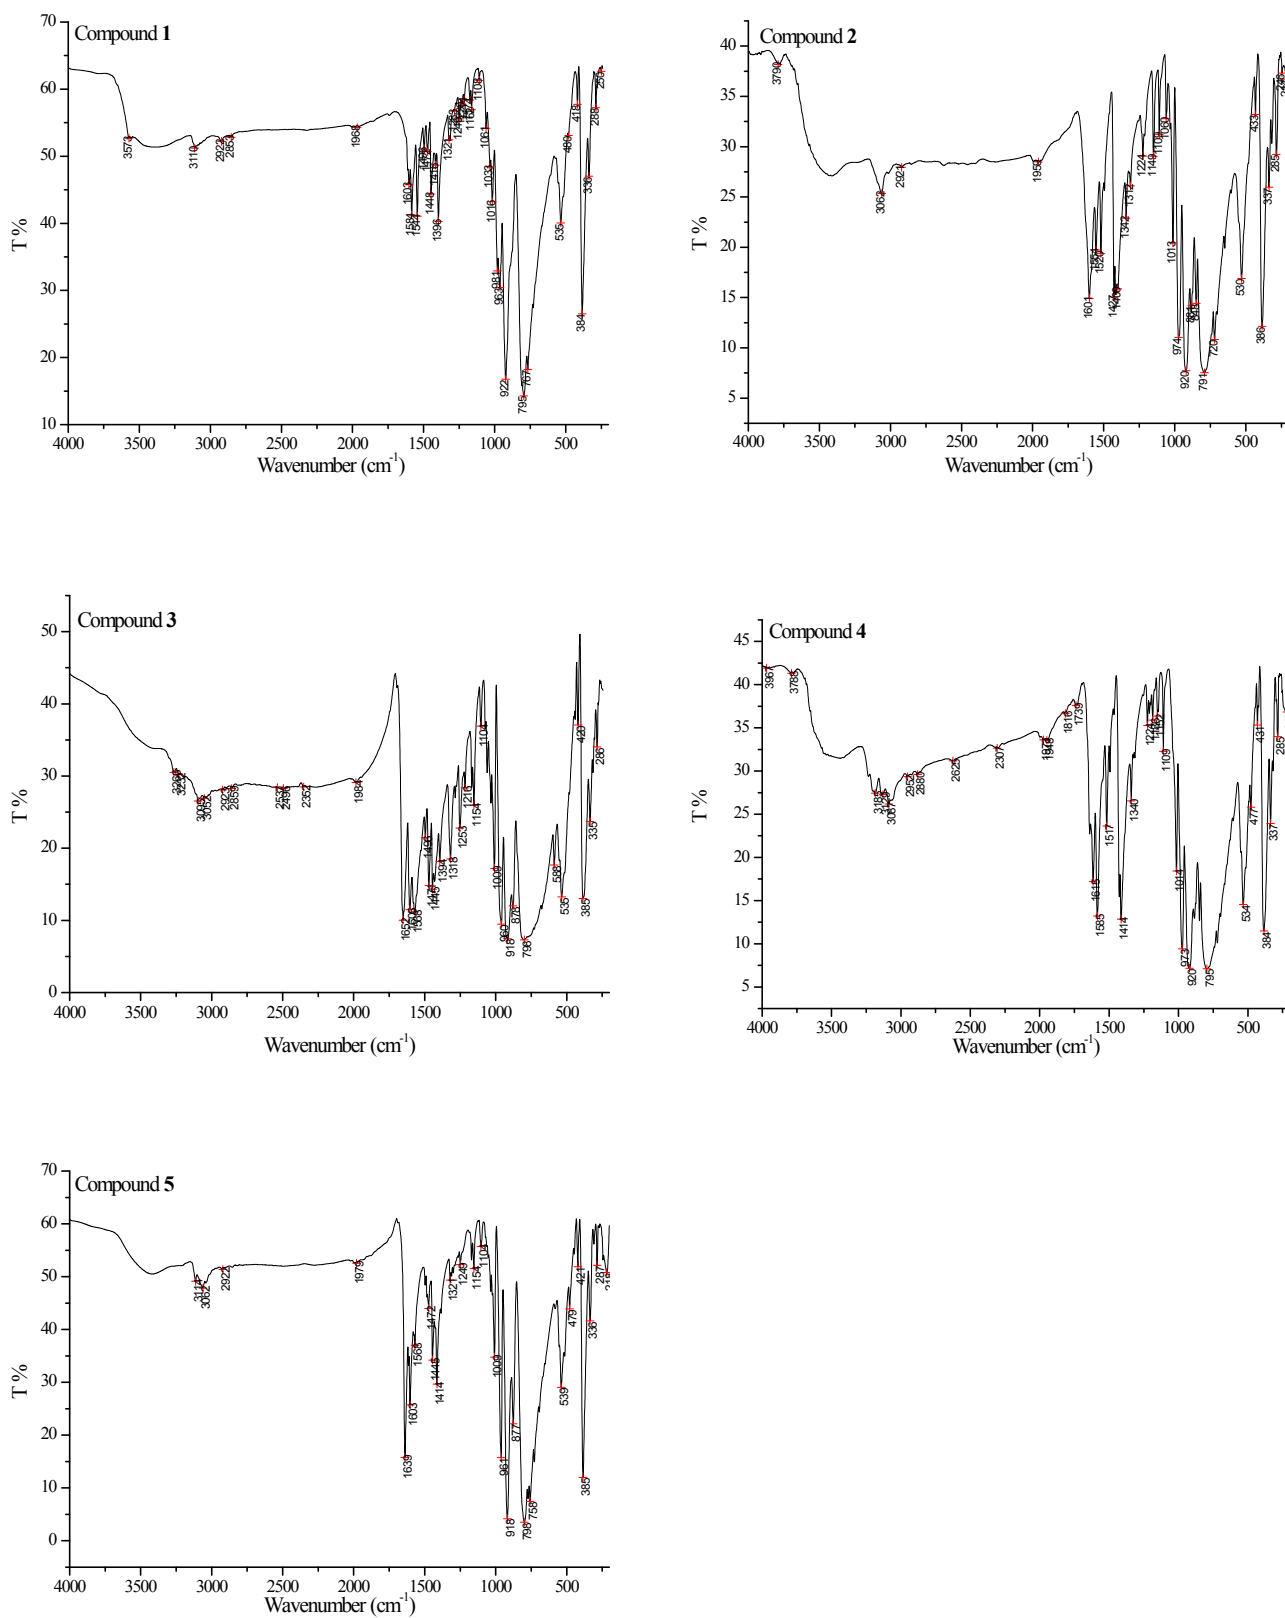

Fig. s1. IR spectra of compounds 1-5.

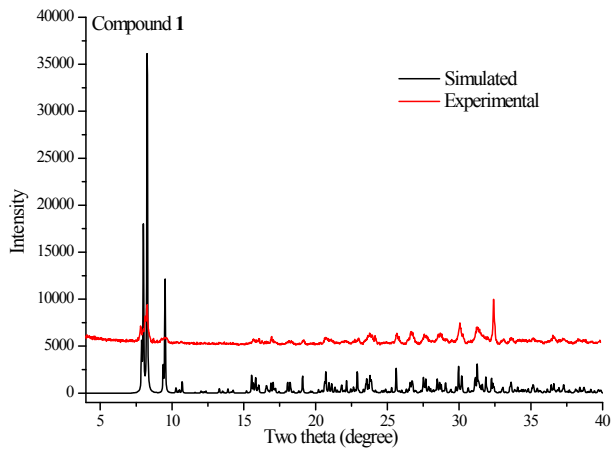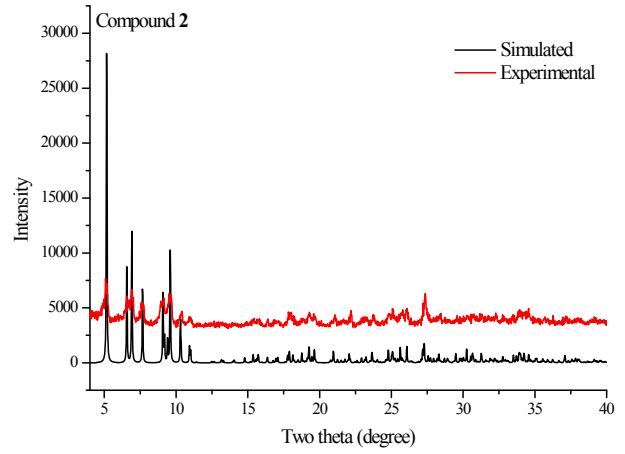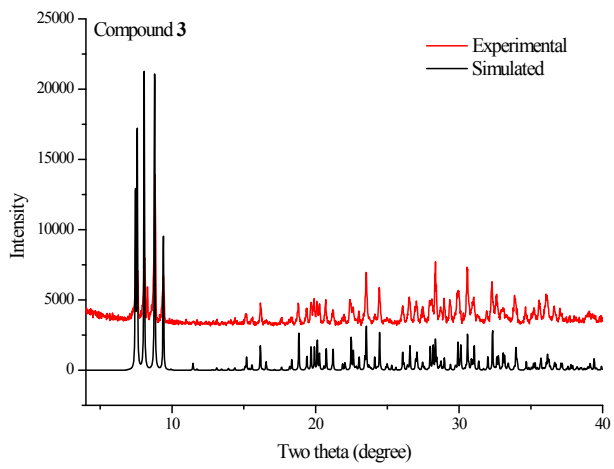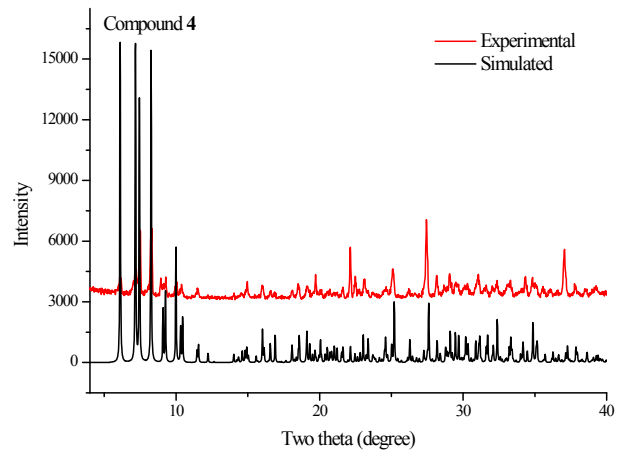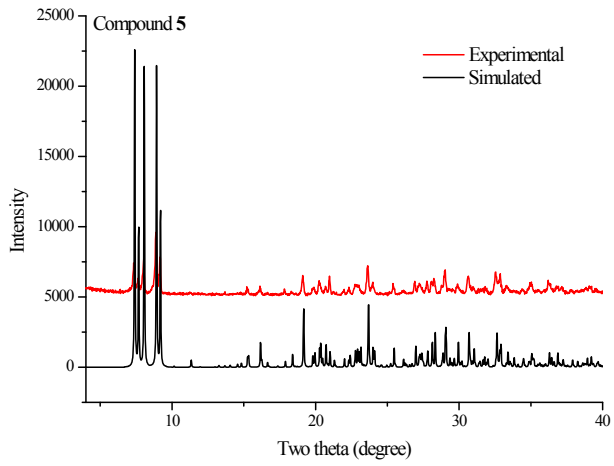

Fig. s2. Experimental and simulated patterns of compounds 1-5.

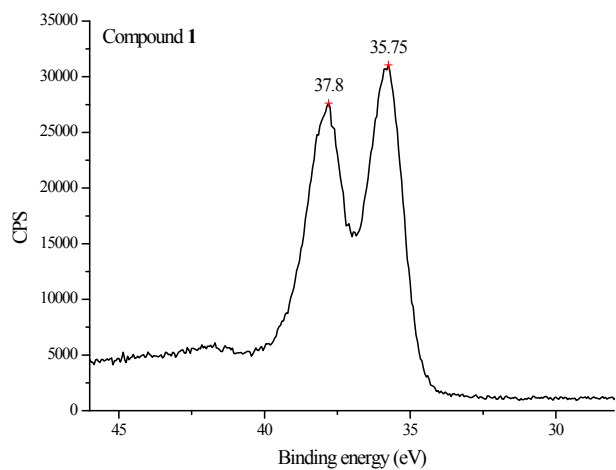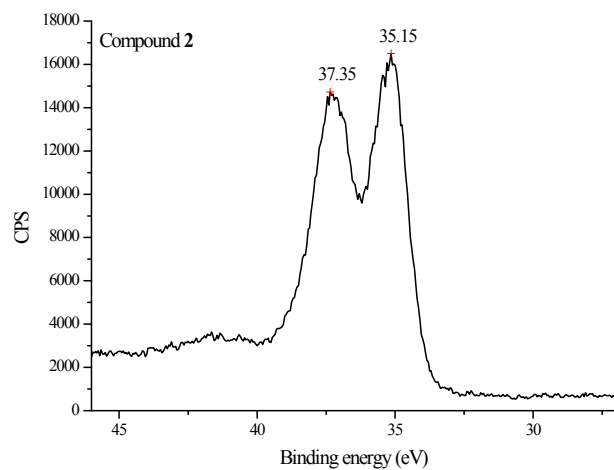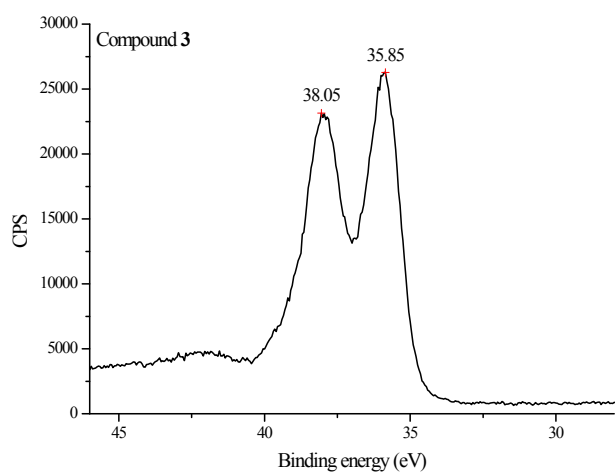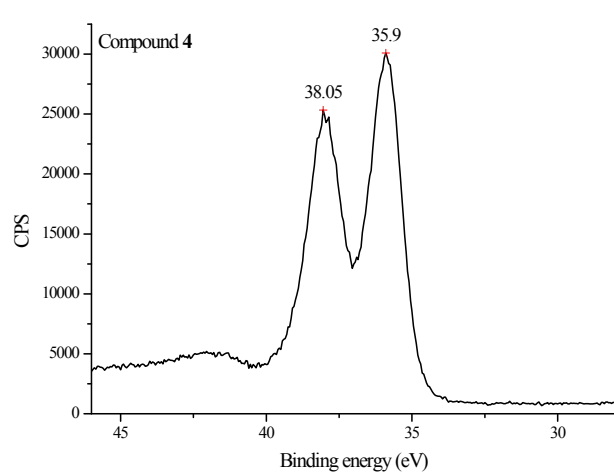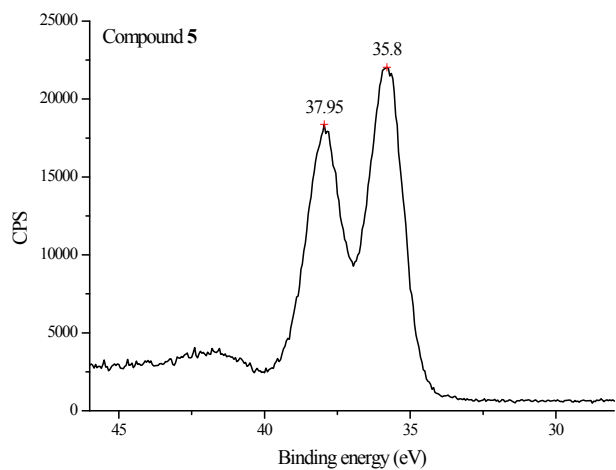

Fig. s3. XPS spectra of tungsten atoms in compounds 1-5.

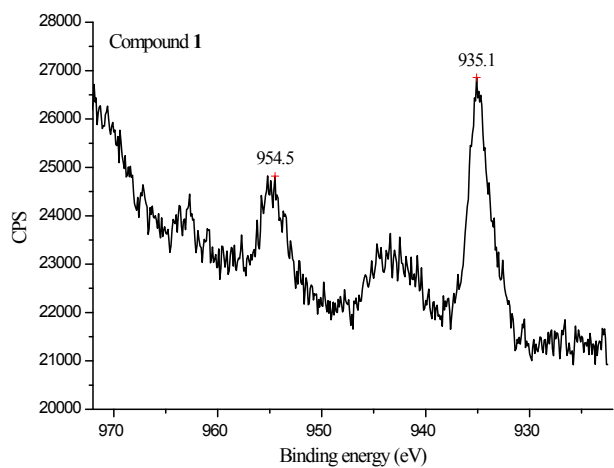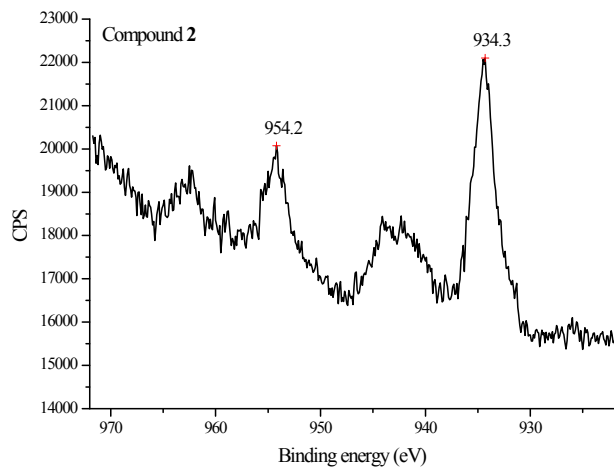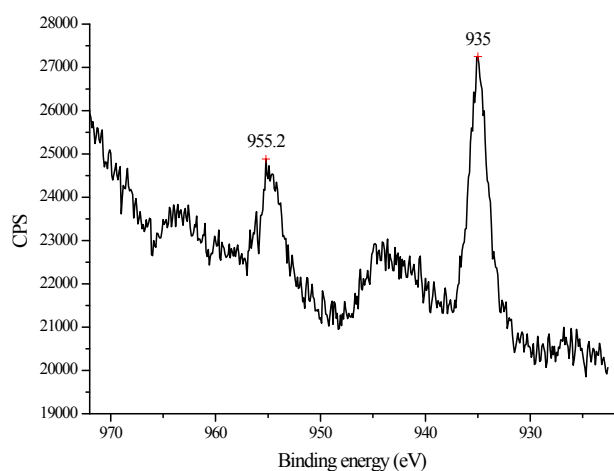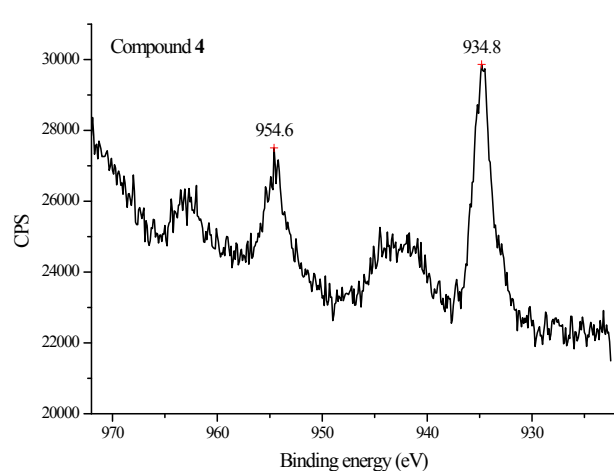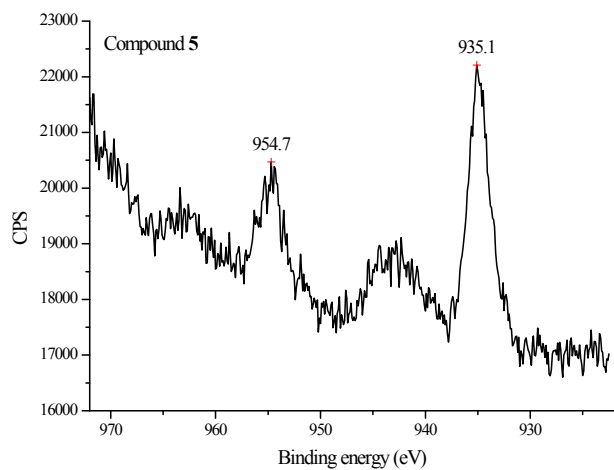

Fig. s4. XPS spectra of copper atoms in compounds 1-5.

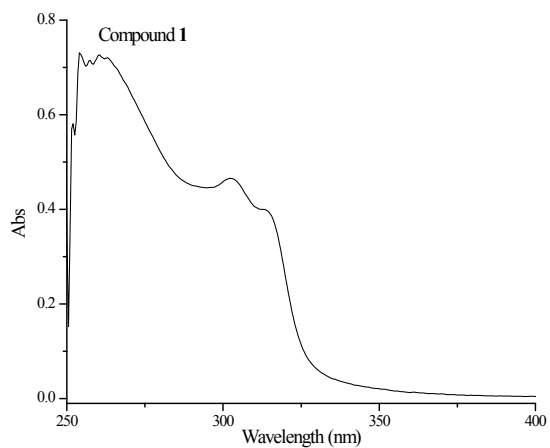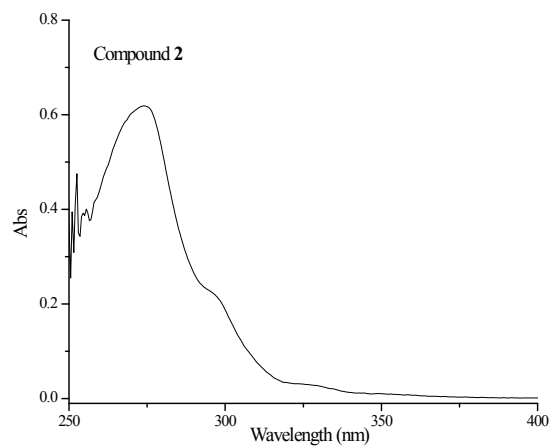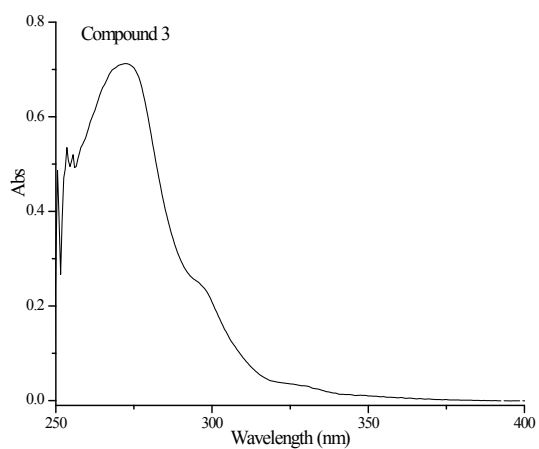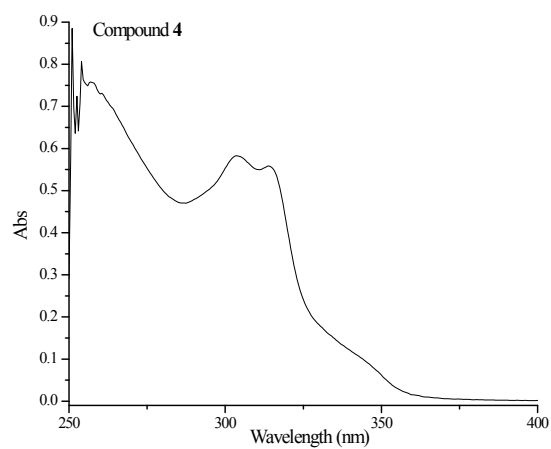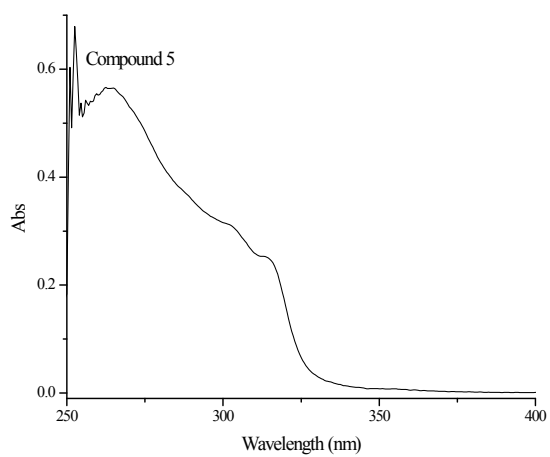

Fig. s5. UV-Vis spectra of compounds 1-5.

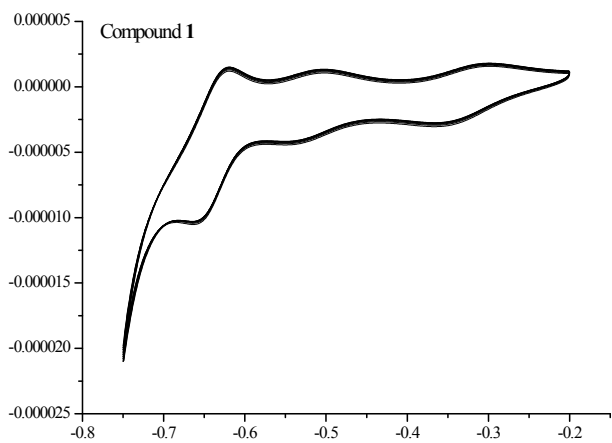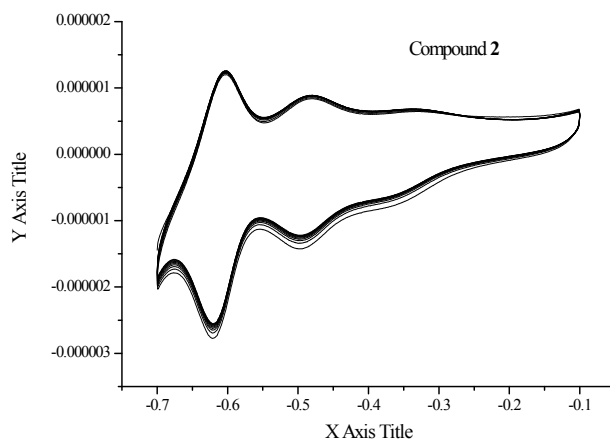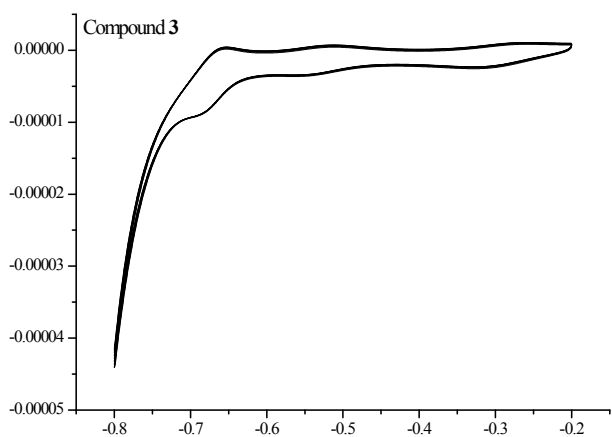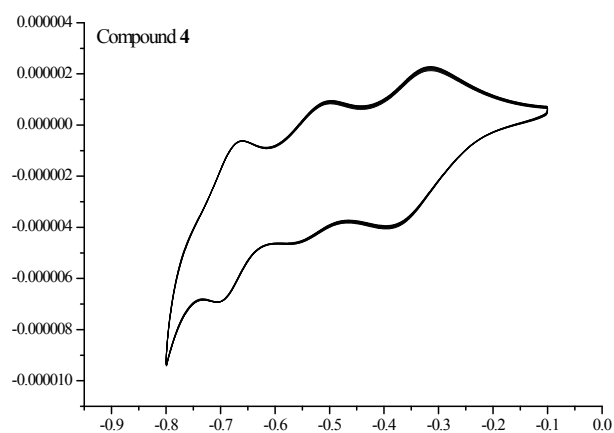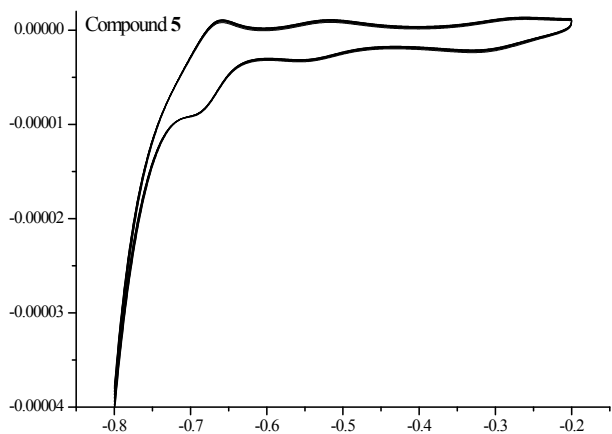

Fig. s6. Cyclic voltammograms of saturated DMSO solutions of compounds 1-5.

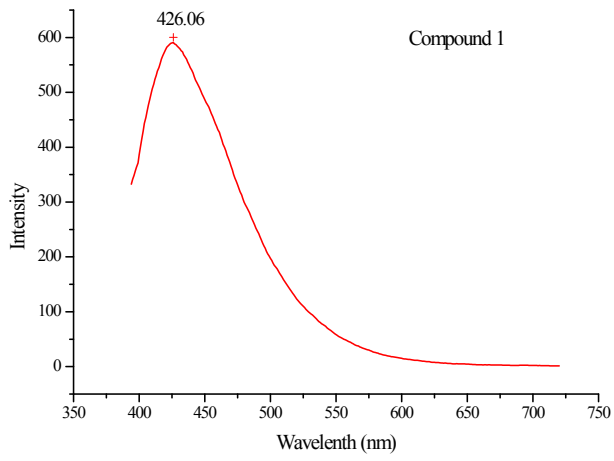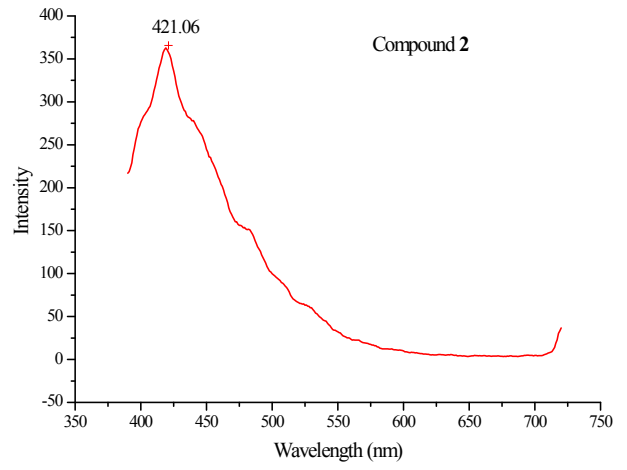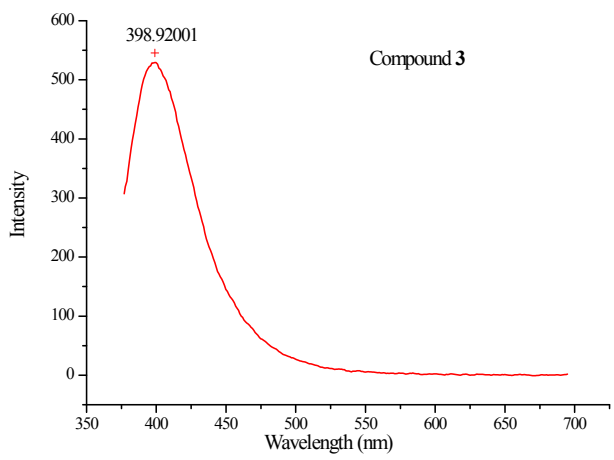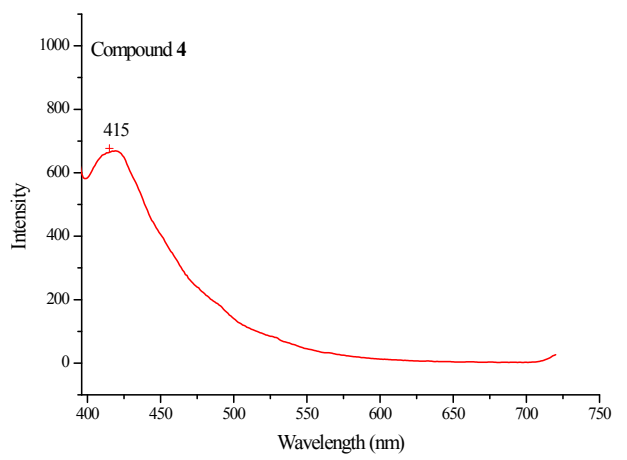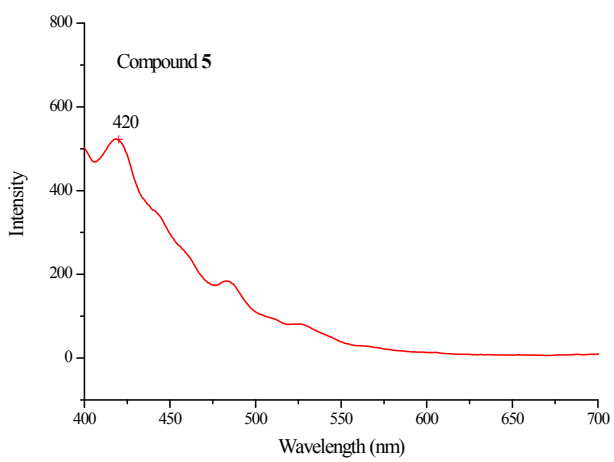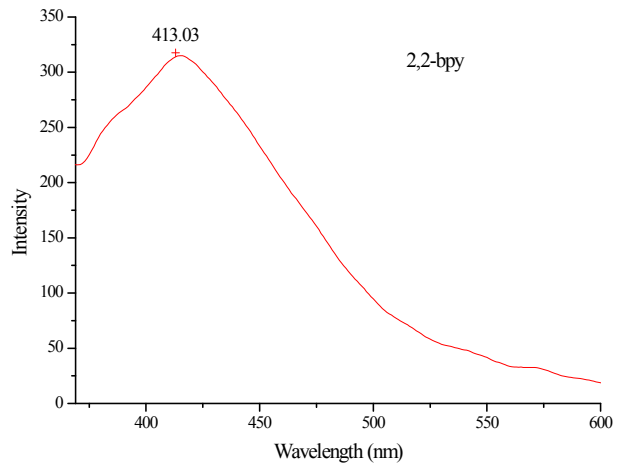

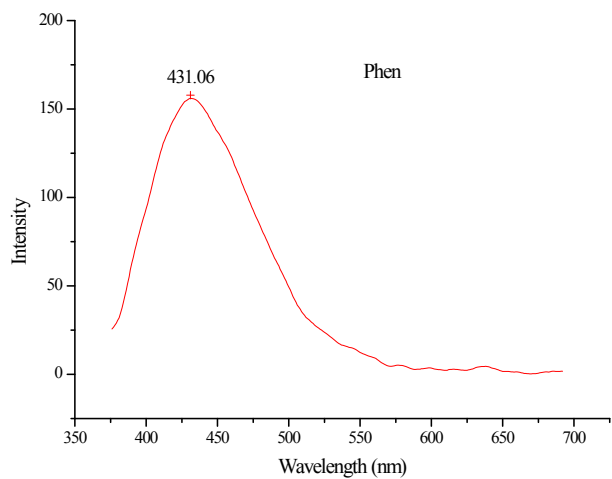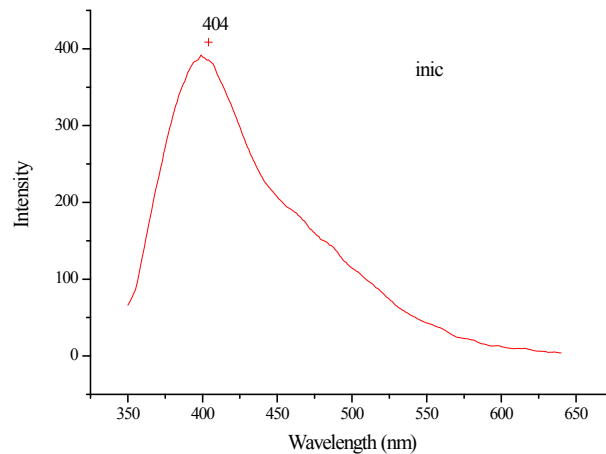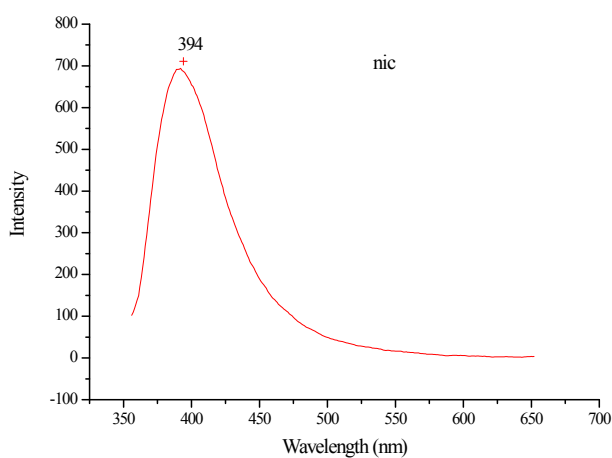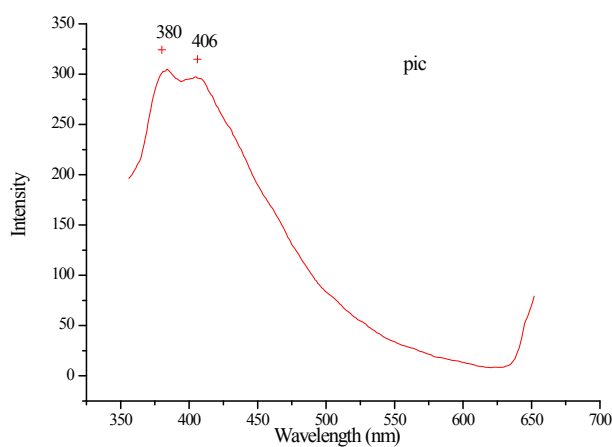

Fig. s7. Photoluminescence properties of DMSO solutions of compounds 1-5.

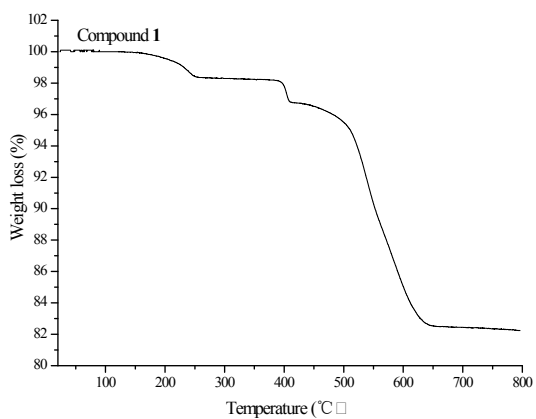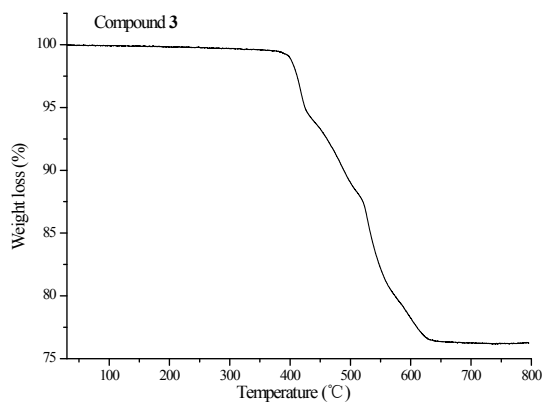



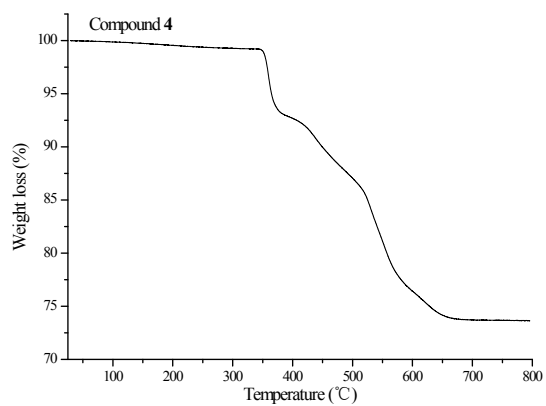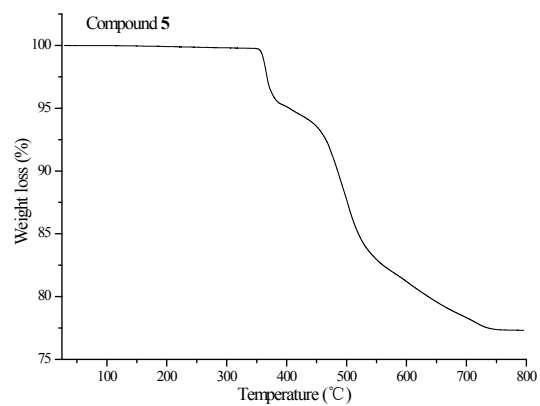

Fig. s8. TG curves of compounds 1, 3, 4 and 5.

Table s1. Selected important bond distances of compounds 1-5.

| Compound 1 |           |               |           |               |           |              |           |
|------------|-----------|---------------|-----------|---------------|-----------|--------------|-----------|
| W(1)-O(27) | 1.699(10) | W(8)-O(13)    | 1.878(10) | Cu(2)-N(3)    | 1.966(12) | C(15)-C(16)  | 1.51(2)   |
| W(1)-O(10) | 1.911(10) | W(8)-O(26)    | 1.903(9)  | Cu(2)-N(4)    | 1.997(11) | C(16)-N(4)   | 1.299(18) |
| W(1)-O(21) | 1.916(10) | W(8)-O(40)    | 1.907(9)  | Cu(2)-O(4)    | 2.461(10) | C(16)-C(17)  | 1.41(2)   |
| W(1)-O(12) | 1.922(10) | W(8)-O(36)    | 1.968(10) | Si(1)-O(19)   | 1.608(9)  | C(17)-C(18)  | 1.39(3)   |
| W(1)-O(6)  | 1.938(10) | W(8)-O(19)    | 2.360(9)  | Si(1)-O(39)   | 1.623(10) | C(17)-H(17A) | 0.9300    |
| W(1)-O(39) | 2.351(9)  | W(9)-O(20)    | 1.710(10) | Si(1)-O(28)   | 1.626(9)  | C(18)-C(19)  | 1.38(2)   |
| W(2)-O(8)  | 1.692(11) | W(9)-O(17)    | 1.889(10) | Si(1)-O(11)   | 1.630(10) | C(18)-H(18A) | 0.9300    |
| W(2)-O(3)  | 1.887(11) | W(9)-O(24)    | 1.892(10) | O(20)-Cu(3)#4 | 2.502(11) | C(19)-C(20)  | 1.37(2)   |
| W(2)-O(31) | 1.912(9)  | W(9)-O(38)    | 1.917(9)  | O(27)-Cu(1)#5 | 2.629(11) | C(19)-H(19A) | 0.9300    |
| W(2)-O(9)  | 1.915(10) | W(9)-O(40)    | 1.922(9)  | O(37)-Cu(3)#6 | 2.539(10) | C(20)-N(4)   | 1.321(18) |
| W(2)-O(17) | 1.952(10) | W(9)-O(19)    | 2.360(9)  | O(42)-C(36)   | 1.273(16) | C(20)-H(20A) | 0.9300    |
| W(2)-O(28) | 2.337(9)  | W(10)-O(29)   | 1.704(10) | O(43)-C(36)   | 1.240(15) | C(21)-N(5)   | 1.30(2)   |
| W(3)-O(5)  | 1.682(11) | W(10)-O(30)   | 1.920(9)  | N(1)-C(1)     | 1.335(18) | C(21)-C(22)  | 1.42(2)   |
| W(3)-O(24) | 1.909(9)  | W(10)-O(18)   | 1.923(10) | N(1)-C(5)     | 1.365(17) | C(21)-H(21A) | 0.9300    |
| W(3)-O(6)  | 1.909(10) | W(10)-O(33)   | 1.933(10) | C(1)-C(2)     | 1.38(2)   | C(22)-C(23)  | 1.35(3)   |
| W(3)-O(3)  | 1.911(10) | W(10)-O(25)   | 1.933(9)  | C(1)-H(1A)    | 0.9300    | C(22)-H(22A) | 0.9300    |
| W(3)-O(34) | 1.917(10) | W(10)-O(11)   | 2.342(9)  | C(2)-C(3)     | 1.36(2)   | C(23)-C(24)  | 1.41(3)   |
| W(3)-O(39) | 2.341(9)  | W(11)-O(22)   | 1.696(10) | C(2)-H(2A)    | 0.9300    | C(23)-H(23A) | 0.9300    |
| W(4)-O(4)  | 1.710(10) | W(11)-O(32)   | 1.888(10) | C(3)-C(4)     | 1.37(2)   | C(24)-C(25)  | 1.36(2)   |
| W(4)-O(23) | 1.894(10) | W(11)-O(25)   | 1.891(10) | C(3)-H(3A)    | 0.9300    | C(24)-H(24A) | 0.9300    |
| W(4)-O(14) | 1.896(10) | W(11)-O(9)    | 1.924(10) | C(4)-C(5)     | 1.34(2)   | C(25)-N(5)   | 1.365(18) |
| W(4)-O(18) | 1.906(10) | W(11)-O(35)   | 1.943(9)  | C(4)-H(4A)    | 0.9300    | C(25)-C(26)  | 1.45(2)   |
| W(4)-O(26) | 1.910(9)  | W(11)-O(28)   | 2.340(8)  | C(5)-C(6)     | 1.47(2)   | C(26)-N(6)   | 1.302(19) |
| W(4)-O(11) | 2.335(8)  | W(12)-O(37)   | 1.724(10) | C(6)-N(2)     | 1.370(18) | C(26)-C(27)  | 1.39(2)   |
| W(5)-O(7)  | 1.671(11) | W(12)-O(30)   | 1.873(9)  | C(6)-C(7)     | 1.37(2)   | C(27)-C(28)  | 1.36(3)   |
| W(5)-O(13) | 1.915(10) | W(12)-O(36)   | 1.890(9)  | C(7)-C(8)     | 1.43(2)   | C(27)-H(27A) | 0.9300    |
| W(5)-O(21) | 1.928(10) | W(12)-O(38)   | 1.914(9)  | C(7)-H(7A)    | 0.9300    | C(28)-C(29)  | 1.41(3)   |
| W(5)-O(34) | 1.932(11) | W(12)-O(35)   | 1.922(9)  | C(8)-C(9)     | 1.37(2)   | C(28)-H(28A) | 0.9300    |
| W(5)-O(23) | 1.935(11) | W(12)-O(19)   | 2.342(9)  | C(8)-H(8A)    | 0.9300    | C(30)-N(6)   | 1.318(18) |
| W(5)-O(39) | 2.369(8)  | Cu(3)-OW1     | 1.967(10) | C(9)-C(10)    | 1.38(2)   | C(30)-C(29)  | 1.42(2)   |
| W(6)-O(16) | 1.709(10) | Cu(3)-N(5)    | 1.983(13) | C(9)-H(9A)    | 0.9300    | C(30)-H(30A) | 0.9300    |
| W(6)-O(10) | 1.916(10) | Cu(3)-N(6)    | 2.010(12) | C(10)-N(2)    | 1.329(19) | C(31)-N(7)   | 1.333(17) |
| W(6)-O(2)  | 1.919(10) | Cu(3)-N(7)    | 2.027(12) | C(10)-H(10A)  | 0.9300    | C(31)-C(32)  | 1.37(2)   |
| W(6)-O(14) | 1.932(10) | Cu(3)-O(20)#1 | 2.502(11) | N(3)-C(11)    | 1.32(2)   | C(31)-H(31A) | 0.9300    |
| W(6)-O(33) | 1.933(10) | Cu(3)-O(37)#2 | 2.539(10) | N(3)-C(15)    | 1.36(2)   | C(32)-C(33)  | 1.37(2)   |
| W(6)-O(11) | 2.355(9)  | Cu(1)-O(41)   | 1.877(10) | C(11)-C(12)   | 1.39(2)   | C(32)-H(32A) | 0.9300    |
| W(7)-O(15) | 1.712(10) | Cu(1)-O(42)   | 1.971(10) | C(11)-H(11A)  | 0.9300    | C(33)-C(34)  | 1.375(19) |
| W(7)-O(2)  | 1.883(10) | Cu(1)-N(2)    | 1.974(12) | C(12)-C(13)   | 1.40(2)   | C(33)-C(36)  | 1.517(18) |
| W(7)-O(12) | 1.893(10) | Cu(1)-N(1)    | 2.009(12) | C(12)-H(12A)  | 0.9300    | C(34)-C(35)  | 1.39(2)   |
| W(7)-O(31) | 1.933(10) | Cu(1)-O(27)#3 | 2.629(11) | C(13)-C(14)   | 1.34(2)   | C(34)-H(34A) | 0.9300    |
| W(7)-O(32) | 1.939(10) | Cu(1)-Cu(2)   | 3.289(2)  | C(13)-H(13A)  | 0.9300    | C(35)-N(7)   | 1.322(18) |
| W(7)-O(28) | 2.356(8)  | Cu(2)-O(41)   | 1.913(10) | C(14)-C(15)   | 1.41(2)   | C(35)-H(35A) | 0.9300    |
| W(8)-O(1)  | 1.685(10) | Cu(2)-O(43)   | 1.955(9)  | C(14)-H(14A)  | 0.9300    | C(29)-H(29A) | 0.9300    |
| Compound 2 |           |               |           |               |           |              |           |

|               |           |              |           |              |           |               |           |
|---------------|-----------|--------------|-----------|--------------|-----------|---------------|-----------|
| O(23)-C(42)   | 1.238(16) | W(6)-O(19)#2 | 1.872(10) | N(6)-C(36)   | 1.332(18) | C(25)-H(25A)  | 0.9300    |
| O(23)-Cu(1)   | 1.944(9)  | W(6)-O(17)   | 1.875(13) | N(6)-Cu(3)   | 2.019(11) | C(26)-C(27)   | 1.32(3)   |
| O(24)-C(42)   | 1.251(16) | W(6)-O(16)#2 | 1.876(11) | C(1)-C(2)    | 1.40(2)   | C(26)-H(26A)  | 0.9300    |
| O(24)-Cu(2)   | 1.979(9)  | W(6)-O(18)   | 1.895(13) | C(1)-H(1A)   | 0.9300    | C(27)-C(28)   | 1.43(3)   |
| N(13)-C(37)   | 1.307(19) | W(6)-O(2)    | 2.343(15) | C(2)-C(3)    | 1.37(2)   | C(27)-H(27A)  | 0.9300    |
| N(13)-C(41)   | 1.311(17) | W(6)-O(1)#2  | 2.358(14) | C(2)-H(2A)   | 0.9300    | C(28)-C(29)   | 1.43(3)   |
| N(13)-Cu(3)#1 | 2.019(10) | Si(1)-O(4)   | 1.607(13) | C(3)-C(4)    | 1.40(2)   | C(28)-C(36)   | 1.43(2)   |
| W(1)-O(12)    | 1.688(10) | Si(1)-O(4)#2 | 1.607(13) | C(3)-H(3A)   | 0.9300    | C(29)-C(30)   | 1.35(4)   |
| W(1)-O(5)     | 1.881(14) | Si(1)-O(1)#2 | 1.609(13) | C(4)-C(12)   | 1.400(18) | C(29)-H(29A)  | 0.9300    |
| W(1)-O(17)    | 1.889(13) | Si(1)-O(1)   | 1.609(13) | C(4)-C(5)    | 1.41(2)   | C(30)-C(31)   | 1.44(3)   |
| W(1)-O(21)    | 1.907(14) | Si(1)-O(2)#2 | 1.618(16) | C(5)-C(6)    | 1.34(2)   | C(30)-H(30A)  | 0.9300    |
| W(1)-O(10)    | 1.913(10) | Si(1)-O(2)   | 1.618(16) | C(5)-H(5A)   | 0.9300    | C(31)-C(35)   | 1.38(2)   |
| W(1)-O(4)     | 2.377(14) | Si(1)-O(3)#2 | 1.688(14) | C(6)-C(7)    | 1.45(2)   | C(31)-C(32)   | 1.38(3)   |
| W(1)-O(1)#2   | 2.393(14) | Si(1)-O(3)   | 1.688(14) | C(6)-H(6A)   | 0.9300    | C(32)-C(33)   | 1.37(4)   |
| W(2)-O(14)    | 1.672(9)  | O(1)-O(2)#2  | 1.78(2)   | C(7)-C(11)   | 1.365(19) | C(32)-H(32A)  | 0.9300    |
| W(2)-O(21)    | 1.890(14) | O(1)-O(4)#2  | 1.815(19) | C(7)-C(8)    | 1.42(2)   | C(33)-C(34)   | 1.43(3)   |
| W(2)-O(9)     | 1.892(10) | O(1)-W(6)#2  | 2.358(14) | C(8)-C(9)    | 1.37(2)   | C(33)-H(33A)  | 0.9300    |
| W(2)-O(13)    | 1.900(14) | O(1)-W(1)#2  | 2.393(14) | C(8)-H(8A)   | 0.9300    | C(34)-H(34A)  | 0.9300    |
| W(2)-O(16)    | 1.909(11) | O(2)-O(1)#2  | 1.78(2)   | C(9)-C(10)   | 1.40(2)   | C(35)-C(36)   | 1.41(2)   |
| W(2)-O(4)     | 2.377(13) | O(2)-O(4)#2  | 1.85(2)   | C(9)-H(9A)   | 0.9300    | C(37)-C(38)   | 1.413(19) |
| W(2)-O(2)#2   | 2.405(15) | O(2)-W(2)#2  | 2.405(15) | C(10)-H(10A) | 0.9300    | C(37)-H(37A)  | 0.9300    |
| W(3)-O(7)     | 1.670(9)  | O(4)-O(1)#2  | 1.815(19) | C(11)-C(12)  | 1.434(17) | C(38)-C(39)   | 1.342(19) |
| W(3)-O(10)#2  | 1.869(10) | O(4)-O(2)#2  | 1.85(2)   | C(13)-C(14)  | 1.39(2)   | C(38)-H(38A)  | 0.9300    |
| W(3)-O(22)    | 1.875(15) | O(9)-W(5)#2  | 1.896(10) | C(13)-H(13A) | 0.9300    | C(39)-C(40)   | 1.386(18) |
| W(3)-O(20)    | 1.894(15) | O(10)-W(3)#2 | 1.869(10) | C(14)-C(15)  | 1.35(2)   | C(39)-C(42)   | 1.530(17) |
| W(3)-O(19)    | 1.935(11) | O(16)-W(6)#2 | 1.876(11) | C(14)-H(14A) | 0.9300    | C(40)-C(41)   | 1.408(18) |
| W(3)-O(3)     | 2.344(14) | O(19)-W(6)#2 | 1.872(10) | C(15)-C(16)  | 1.39(2)   | C(40)-H(40A)  | 0.9300    |
| W(3)-O(1)     | 2.468(14) | N(1)-C(1)    | 1.342(17) | C(15)-H(15A) | 0.9300    | C(41)-H(41A)  | 0.9300    |
| W(4)-O(6)     | 1.649(9)  | N(1)-C(12)   | 1.357(17) | C(16)-C(24)  | 1.398(19) | Cu(1)-Cl(1)   | 2.258(4)  |
| W(4)-O(20)    | 1.897(14) | N(1)-Cu(1)   | 1.997(11) | C(16)-C(17)  | 1.45(2)   | Cu(1)-Cl(2)   | 2.726(4)  |
| W(4)-O(5)     | 1.899(14) | N(2)-C(10)   | 1.326(17) | C(17)-C(18)  | 1.34(2)   | Cu(1)-Cu(2)   | 3.266(2)  |
| W(4)-O(13)    | 1.907(14) | N(2)-C(11)   | 1.363(16) | C(17)-H(17A) | 0.9300    | Cu(2)-Cl(2)   | 2.313(4)  |
| W(4)-O(15)    | 1.912(14) | N(2)-Cu(1)   | 1.997(10) | C(18)-C(19)  | 1.419(19) | Cu(2)-Cl(1)   | 2.757(4)  |
| W(4)-O(3)     | 2.403(14) | N(3)-C(13)   | 1.327(16) | C(18)-H(18A) | 0.9300    | Cu(2)-Cl(3)   | 2.938(5)  |
| W(4)-O(4)     | 2.458(14) | N(3)-C(24)   | 1.347(17) | C(19)-C(23)  | 1.381(18) | Cu(3)-N(13)#1 | 2.019(10) |
| W(5)-O(8)     | 1.680(9)  | N(3)-Cu(2)   | 1.997(10) | C(19)-C(20)  | 1.41(2)   | Cu(3)-Cl(3)   | 2.257(4)  |
| W(5)-O(15)    | 1.869(14) | N(4)-C(22)   | 1.314(17) | C(20)-C(21)  | 1.35(3)   | Cu(3)-Cl(2)   | 2.748(4)  |
| W(5)-O(18)    | 1.886(13) | N(4)-C(23)   | 1.357(17) | C(20)-H(20A) | 0.9300    |               |           |
| W(5)-O(9)#2   | 1.896(10) | N(4)-Cu(2)   | 2.027(11) | C(21)-C(22)  | 1.39(2)   |               |           |
| W(5)-O(22)    | 1.910(14) | N(5)-C(34)   | 1.32(2)   | C(21)-H(21A) | 0.9300    |               |           |
| W(5)-O(3)     | 2.333(14) | N(5)-C(35)   | 1.37(2)   | C(22)-H(22A) | 0.9300    |               |           |
| W(5)-O(2)     | 2.437(16) | N(5)-Cu(3)   | 2.013(12) | C(23)-C(24)  | 1.402(19) |               |           |
| W(6)-O(11)    | 1.688(10) | N(6)-C(25)   | 1.326(19) | C(25)-C(26)  | 1.38(2)   |               |           |
| Compound 3    |           |              |           |              |           |               |           |
| W(1)-O(18)    | 1.64(3)   | W(5)-O(22)   | 1.64(2)   | O(3)-W(6)#1  | 2.39(5)   | N(3)-C(11)    | 1.35(4)   |
| W(1)-O(8)#1   | 1.85(3)   | W(5)-O(7)#1  | 1.88(3)   | O(4)-W(4)#1  | 2.37(5)   | N(3)-C(15)    | 1.38(4)   |
| W(1)-O(15)    | 1.88(3)   | W(5)-O(5)    | 1.88(3)   | O(4)-W(6)#1  | 2.41(5)   | C(23)-C(22)   | 1.31(6)   |

|               |           |              |           |              |           |              |         |
|---------------|-----------|--------------|-----------|--------------|-----------|--------------|---------|
| W(1)-O(13)#1  | 1.93(3)   | W(5)-O(6)    | 1.90(3)   | Cu(2)-O(40)  | 1.94(2)   | C(25)-C(21)  | 1.33(5) |
| W(1)-O(11)    | 1.94(3)   | W(5)-O(10)   | 1.91(3)   | Cu(2)-N(3)   | 1.99(3)   | C(25)-C(24)  | 1.41(4) |
| W(1)-O(3)     | 2.35(5)   | W(5)-O(1)#1  | 2.39(5)   | Cu(2)-N(4)   | 2.00(3)   | C(25)-C(26)  | 1.45(4) |
| W(1)-O(2)     | 2.46(5)   | W(5)-O(4)    | 2.43(5)   | Cu(2)-Cl(1)  | 2.240(11) | C(6)-C(5)    | 1.38(5) |
| W(2)-O(21)    | 1.65(3)   | W(6)-O(20)   | 1.68(2)   | Cu(1)-O(41)  | 1.90(2)   | C(6)-C(7)    | 1.47(5) |
| W(2)-O(11)    | 1.85(3)   | W(6)-O(9)    | 1.84(3)   | Cu(1)-O(43)  | 1.94(2)   | C(10)-C(9)   | 1.37(5) |
| W(2)-O(10)    | 1.89(3)   | W(6)-O(5)#1  | 1.89(3)   | Cu(1)-N(2)   | 1.98(3)   | O(40)-C(26)  | 1.22(4) |
| W(2)-O(16)    | 1.93(3)   | W(6)-O(12)   | 1.92(3)   | Cu(1)-N(1)   | 1.99(3)   | C(15)-C(14)  | 1.39(5) |
| W(2)-O(14)    | 1.97(3)   | W(6)-O(13)   | 1.92(3)   | O(13)-W(1)#1 | 1.93(3)   | C(20)-C(19)  | 1.33(6) |
| W(2)-O(2)     | 2.37(5)   | W(6)-O(3)#1  | 2.39(5)   | O(8)-W(1)#1  | 1.85(3)   | C(5)-C(4)    | 1.40(5) |
| W(2)-O(1)#1   | 2.37(5)   | W(6)-O(4)#1  | 2.41(5)   | O(7)-W(5)#1  | 1.88(3)   | C(22)-C(21)  | 1.40(5) |
| W(3)-O(17)    | 1.71(2)   | Si(1)-O(2)#1 | 1.56(6)   | O(5)-W(6)#1  | 1.89(3)   | C(9)-C(8)    | 1.39(5) |
| W(3)-O(8)     | 1.88(3)   | Si(1)-O(2)   | 1.56(6)   | N(4)-C(20)   | 1.31(5)   | C(17)-C(18)  | 1.33(6) |
| W(3)-O(9)     | 1.88(3)   | Si(1)-O(4)#1 | 1.61(5)   | N(4)-C(16)   | 1.41(4)   | C(18)-C(19)  | 1.27(5) |
| W(3)-O(14)    | 1.91(3)   | Si(1)-O(4)   | 1.61(5)   | O(41)-C(26)  | 1.32(4)   | C(11)-C(12)  | 1.43(5) |
| W(3)-O(6)     | 1.93(3)   | Si(1)-O(1)   | 1.63(5)   | N(5)-C(24)   | 1.36(4)   | C(2)-C(3)    | 1.34(6) |
| W(3)-O(1)#1   | 2.39(5)   | Si(1)-O(1)#1 | 1.63(5)   | N(5)-C(23)   | 1.40(5)   | C(12)-C(13)  | 1.20(5) |
| W(3)-O(3)#1   | 2.39(5)   | Si(1)-O(3)#1 | 1.65(5)   | O(43)-C(24)  | 1.18(4)   | C(8)-C(7)    | 1.22(5) |
| W(4)-O(19)    | 1.66(3)   | Si(1)-O(3)   | 1.65(5)   | N(2)-C(10)   | 1.29(4)   | C(14)-C(13)  | 1.32(6) |
| W(4)-O(16)    | 1.84(3)   | O(1)-O(2)#1  | 1.80(7)   | N(2)-C(6)    | 1.30(4)   | C(3)-C(4)    | 1.38(5) |
| W(4)-O(7)     | 1.85(3)   | O(1)-W(2)#1  | 2.37(5)   | N(1)-C(1)    | 1.30(5)   |              |         |
| W(4)-O(12)    | 1.88(3)   | O(1)-W(3)#1  | 2.39(5)   | N(1)-C(5)    | 1.43(4)   |              |         |
| W(4)-O(15)    | 1.89(3)   | O(1)-W(5)#1  | 2.39(5)   | C(1)-C(2)    | 1.28(5)   |              |         |
| W(4)-O(4)#1   | 2.37(5)   | O(2)-O(1)#1  | 1.80(7)   | C(16)-C(15)  | 1.39(5)   |              |         |
| W(4)-O(2)     | 2.45(5)   | O(3)-W(3)#1  | 2.39(5)   | C(16)-C(17)  | 1.46(5)   |              |         |
| Compound 4    |           |              |           |              |           |              |         |
| Cu(1)-O(24)   | 1.96(2)   | W(6)-O(7)    | 1.88(3)   | O(15)-W(4)#2 | 1.90(2)   | C(4)-C(5)    | 1.47(4) |
| Cu(1)-N(3)    | 2.01(2)   | W(6)-O(10)   | 1.91(3)   | O(5)-W(1)#2  | 1.89(3)   | C(19)-C(20)  | 1.38(4) |
| Cu(1)-N(4)    | 2.03(2)   | W(6)-O(11)   | 1.94(3)   | O(24)-C(30)  | 1.27(3)   | C(8)-C(9)    | 1.39(5) |
| Cu(1)-Cl(2)   | 2.260(8)  | W(6)-O(3)#2  | 2.37(4)   | O(23)-C(30)  | 1.23(3)   | C(8)-C(7)    | 1.45(5) |
| Cu(1)-O(20)#1 | 2.59(2)   | W(5)-O(17)   | 1.63(2)   | N(4)-C(22)   | 1.29(4)   | C(8)-H(8A)   | 0.9300  |
| Cu(1)-Cl(1)   | 2.812(9)  | W(5)-O(10)   | 1.86(3)   | N(4)-C(23)   | 1.36(3)   | C(28)-C(27)  | 1.33(4) |
| Cu(1)-Cu(2)   | 3.183(6)  | W(5)-O(15)   | 1.87(2)   | N(3)-C(13)   | 1.32(4)   | C(28)-C(29)  | 1.41(4) |
| Cu(2)-O(23)   | 1.946(19) | W(5)-O(6)    | 1.87(3)   | N(3)-C(24)   | 1.36(3)   | C(28)-H(28A) | 0.9300  |
| Cu(2)-N(1)    | 1.99(2)   | W(5)-O(14)   | 1.87(2)   | C(24)-C(16)  | 1.41(4)   | C(29)-H(29A) | 0.9300  |
| Cu(2)-N(2)    | 2.03(2)   | W(5)-O(1)#2  | 2.40(4)   | C(24)-C(23)  | 1.46(4)   | C(9)-C(10)   | 1.39(5) |
| Cu(2)-Cl(1)   | 2.250(8)  | W(4)-O(12)   | 1.71(2)   | N(5)-C(26)   | 1.32(4)   | C(9)-H(9A)   | 0.9300  |
| Cu(2)-Cl(2)   | 2.602(9)  | W(4)-O(25)#2 | 1.86(3)   | N(5)-C(27)   | 1.34(4)   | C(6)-C(5)    | 1.32(5) |
| Si(1)-O(1)#2  | 1.61(4)   | W(4)-O(16)   | 1.891(19) | N(2)-C(10)   | 1.34(4)   | C(6)-C(7)    | 1.41(5) |
| Si(1)-O(1)    | 1.61(4)   | W(4)-O(15)#2 | 1.90(3)   | N(2)-C(11)   | 1.35(4)   | C(6)-H(6A)   | 0.9300  |
| Si(1)-O(3)    | 1.61(4)   | W(4)-O(22)   | 1.90(2)   | N(1)-C(1)    | 1.28(4)   | C(20)-H(20A) | 0.9300  |
| Si(1)-O(3)#2  | 1.61(4)   | W(3)-O(18)   | 1.68(2)   | N(1)-C(12)   | 1.32(4)   | C(17)-H(17A) | 0.9300  |
| Si(1)-O(2)#2  | 1.65(3)   | W(3)-O(7)    | 1.88(3)   | C(22)-C(21)  | 1.33(4)   | C(14)-C(15)  | 1.30(5) |
| Si(1)-O(2)    | 1.65(3)   | W(3)-O(16)   | 1.89(2)   | C(22)-H(22A) | 0.9300    | C(14)-H(14A) | 0.9300  |
| Si(1)-O(4)    | 1.66(3)   | W(3)-O(9)    | 1.91(3)   | C(30)-C(25)  | 1.50(4)   | C(26)-H(26A) | 0.9300  |
| Si(1)-O(4)#2  | 1.66(3)   | W(3)-O(14)#2 | 1.96(2)   | C(12)-C(4)   | 1.41(4)   | C(1)-C(2)    | 1.40(5) |
| O(1)-O(4)     | 1.79(5)   | W(3)-O(3)#2  | 2.38(4)   | C(12)-C(11)  | 1.49(4)   | C(1)-H(1A)   | 0.9300  |

|              |           |               |           |              |         |              |         |
|--------------|-----------|---------------|-----------|--------------|---------|--------------|---------|
| O(1)-W(4)    | 2.35(4)   | W(2)-O(119)   | 1.684(17) | C(23)-C(19)  | 1.35(4) | C(15)-H(15A) | 0.9300  |
| O(1)-W(5)#2  | 2.40(4)   | W(2)-O(11)    | 1.83(3)   | C(13)-C(14)  | 1.39(4) | C(10)-H(10A) | 0.9300  |
| O(1)-W(3)    | 2.46(4)   | W(2)-O(22)    | 1.84(2)   | C(13)-H(13A) | 0.9300  | C(27)-H(27A) | 0.9300  |
| O(2)-W(5)    | 2.35(3)   | W(2)-O(5)     | 1.89(3)   | C(18)-C(17)  | 1.34(5) | C(5)-H(5A)   | 0.9300  |
| O(2)-W(2)    | 2.37(3)   | W(2)-O(6)     | 1.92(3)   | C(18)-C(19)  | 1.46(4) | C(2)-C(3)    | 1.34(5) |
| O(2)-W(6)    | 2.40(3)   | W(1)-O(20)    | 1.708(19) | C(18)-H(18A) | 0.9300  | C(2)-H(2A)   | 0.9300  |
| O(3)-W(6)#2  | 2.37(4)   | W(1)-O(9)     | 1.86(3)   | C(21)-C(20)  | 1.43(4) | C(3)-H(3A)   | 0.9300  |
| O(3)-W(3)#2  | 2.38(4)   | W(1)-O(5)#2   | 1.89(3)   | C(21)-H(21A) | 0.9300  | O(25)-W(4)#2 | 1.86(2) |
| O(3)-W(1)#2  | 2.42(4)   | W(1)-O(25)    | 1.91(3)   | C(16)-C(15)  | 1.37(5) |              |         |
| O(4)-W(2)    | 2.33(3)   | W(1)-O(8)     | 1.91(3)   | C(16)-C(17)  | 1.44(5) |              |         |
| O(4)-W(4)    | 2.35(3)   | W(1)-O(3)#2   | 2.42(4)   | C(11)-C(7)   | 1.33(4) |              |         |
| O(4)-W(1)#2  | 2.42(3)   | W(1)-O(4)#2   | 2.42(3)   | C(25)-C(29)  | 1.37(4) |              |         |
| W(6)-O(21)   | 1.65(2)   | O(20)-Cu(1)#1 | 2.59(2)   | C(25)-C(26)  | 1.38(4) |              |         |
| W(6)-O(8)    | 1.86(3)   | O(14)-W(3)#2  | 1.96(2)   | C(4)-C(3)    | 1.41(5) |              |         |
| Compound 5   |           |               |           |              |         |              |         |
| W(1)-O(21)   | 1.68(2)   | W(8)-O(22)    | 1.92(2)   | O(2)-W(2)#1  | 2.43(4) | C(11)-C(12)  | 1.38(4) |
| W(1)-O(10)   | 1.88(2)   | W(8)-O(3)     | 2.32(4)   | O(2)-W(1)#1  | 2.43(4) | C(11)-H(11A) | 0.9300  |
| W(1)-O(6)    | 1.89(3)   | W(8)-O(1)#1   | 2.45(4)   | O(4)-W(11)#1 | 2.44(4) | C(6)-C(5)    | 1.43(4) |
| W(1)-O(23)#1 | 1.89(2)   | W(11)-O(20)   | 1.66(2)   | N(5)-C(25)   | 1.34(3) | C(24)-C(25)  | 1.37(4) |
| W(1)-O(9)    | 1.89(2)   | W(11)-O(23)   | 1.88(2)   | N(5)-C(21)   | 1.34(3) | C(24)-C(23)  | 1.37(4) |
| W(1)-O(4)    | 2.37(4)   | W(11)-O(7)    | 1.88(2)   | O(11)-W(3)#1 | 1.92(2) | C(24)-H(24A) | 0.9300  |
| W(1)-O(2)#1  | 2.43(4)   | W(11)-O(8)#1  | 1.88(3)   | O(9)-W(3)#1  | 1.90(2) | C(20)-C(19)  | 1.38(4) |
| W(2)-O(19)   | 1.66(2)   | W(11)-O(5)    | 1.93(3)   | O(8)-W(11)#1 | 1.88(3) | C(20)-H(20A) | 0.9300  |
| W(2)-O(22)   | 1.84(3)   | W(11)-O(4)#1  | 2.44(4)   | N(4)-C(16)   | 1.35(3) | C(19)-C(18)  | 1.36(5) |
| W(2)-O(11)   | 1.87(2)   | W(11)-O(3)    | 2.45(4)   | N(4)-C(20)   | 1.36(4) | C(19)-H(19A) | 0.9300  |
| W(2)-O(7)    | 1.90(2)   | Cu(1)-O(29)   | 1.92(2)   | N(3)-C(15)   | 1.34(3) | C(14)-C(13)  | 1.40(5) |
| W(2)-O(10)   | 1.93(2)   | Cu(1)-N(2)    | 1.96(2)   | N(3)-C(11)   | 1.39(3) | C(14)-H(14A) | 0.9300  |
| W(2)-O(3)    | 2.37(4)   | Cu(1)-N(1)    | 1.97(2)   | O(30)-C(26)  | 1.25(3) | C(23)-H(23A) | 0.9300  |
| W(2)-O(2)#1  | 2.43(4)   | Cu(1)-N(5)    | 2.00(2)   | O(29)-C(26)  | 1.24(3) | C(1)-C(2)    | 1.42(4) |
| W(3)-O(15)   | 1.656(19) | Cu(2)-O(30)   | 1.95(2)   | N(1)-C(1)    | 1.33(3) | C(1)-H(1A)   | 0.9300  |
| W(3)-O(9)#1  | 1.90(2)   | Cu(2)-N(3)    | 1.98(2)   | N(1)-C(5)    | 1.34(4) | C(12)-C(13)  | 1.34(5) |
| W(3)-O(12)   | 1.90(2)   | Cu(2)-N(4)    | 1.98(2)   | N(2)-C(10)   | 1.32(4) | C(12)-H(12A) | 0.9300  |
| W(3)-O(14)   | 1.91(2)   | Cu(2)-Cl(1)   | 2.254(7)  | N(2)-C(6)    | 1.38(3) | C(8)-H(8A)   | 0.9300  |
| W(3)-O(11)#1 | 1.92(2)   | Cu(2)-O(17)   | 2.42(2)   | C(15)-C(14)  | 1.39(4) | C(18)-C(17)  | 1.34(5) |
| W(3)-O(2)    | 2.36(3)   | Si(1)-O(1)#1  | 1.59(3)   | C(15)-C(16)  | 1.44(4) | C(18)-H(18A) | 0.9300  |
| W(3)-O(1)#1  | 2.41(4)   | Si(1)-O(1)    | 1.59(3)   | C(16)-C(17)  | 1.39(4) | C(4)-C(3)    | 1.31(5) |
| W(4)-O(17)   | 1.69(2)   | Si(1)-O(2)    | 1.62(4)   | C(21)-C(22)  | 1.40(4) | C(4)-C(5)    | 1.46(4) |
| W(4)-O(14)   | 1.86(2)   | Si(1)-O(2)#1  | 1.62(4)   | C(21)-H(21A) | 0.9300  | C(4)-H(4A)   | 0.9300  |
| W(4)-O(6)    | 1.89(2)   | Si(1)-O(4)    | 1.65(4)   | C(22)-C(23)  | 1.37(4) | C(17)-H(17A) | 0.9300  |
| W(4)-O(18)   | 1.89(2)   | Si(1)-O(4)#1  | 1.65(4)   | C(22)-H(22A) | 0.9300  | C(13)-H(13A) | 0.9300  |
| W(4)-O(8)    | 1.91(2)   | Si(1)-O(3)    | 1.65(5)   | C(7)-C(6)    | 1.36(3) | C(10)-H(10A) | 0.9300  |
| W(4)-O(4)    | 2.33(4)   | Si(1)-O(3)#1  | 1.65(5)   | C(7)-C(8)    | 1.37(4) | C(2)-C(3)    | 1.39(4) |
| W(4)-O(1)#1  | 2.39(3)   | O(1)-O(2)#1   | 1.77(5)   | C(7)-H(7A)   | 0.9300  | C(2)-H(2A)   | 0.9300  |
| W(8)-O(16)   | 1.66(2)   | O(1)-W(4)#1   | 2.39(3)   | C(9)-C(10)   | 1.39(4) | C(3)-H(3A)   | 0.9300  |
| W(8)-O(12)   | 1.86(2)   | O(1)-W(3)#1   | 2.41(4)   | C(9)-C(8)    | 1.41(5) | O(23)-W(1)#1 | 1.89(2) |
| W(8)-O(5)    | 1.89(2)   | O(1)-W(8)#1   | 2.45(4)   | C(9)-H(9A)   | 0.9300  |              |         |
| W(8)-O(18)   | 1.92(2)   | O(2)-O(1)#1   | 1.77(5)   | C(26)-C(25)  | 1.55(4) |              |         |

Table s2 C-H...O and O-H...O interactions in compounds 1-4.

| Compound 1     |             |         |                       |              |           |
|----------------|-------------|---------|-----------------------|--------------|-----------|
| Bonds: Atom #1 | Symmetry #1 | Atom #2 | Symmetry #2           | Distance [Å] | Angle (°) |
| #172: O41      | x, y, z     | C1      | x, y, z               | 2.9645(1)    | 113.0     |
| #173: O41      | x, y, z     | C11     | x, y, z               | 3.0365(1)    | 113.2     |
| #174: OW1      | x, y, z     | C30     | x, y, z               | 3.1672(1)    | 115.4     |
| #175: OW1      | x, y, z     | C31     | x, y, z               | 3.1364(1)    | 95.8      |
| #176: O42      | x, y, z     | C10     | x, y, z               | 3.0073(1)    | 113.8     |
| #177: O42      | x, y, z     | C34     | x, y, z               | 2.8667(1)    | 96.0      |
| #178: O43      | x, y, z     | C20     | x, y, z               | 3.1063(1)    | 114.5     |
| #179: O43      | x, y, z     | C32     | x, y, z               | 2.7821(1)    | 96.8      |
| #181: C9       | x, y, z     | O29     | x, -1+y, z            | 2.9623(1)    | 94.7      |
| #182: C10      | x, y, z     | O29     | x, -1+y, z            | 2.8349(1)    | 102.9     |
| #183: O26      | x, y, z     | C20     | x, y, z               | 3.1531(1)    | 102.1     |
| #184: C30      | x, y, z     | O38     | x, -1+y, z            | 3.1380(1)    | 117.6     |
| #185: C34      | x, y, z     | O29     | x, -1+y, z            | 3.1089(1)    | 126.6     |
| #186: C35      | x, y, z     | O37     | x, -1+y, z            | 3.0963(1)    | 121.8     |
| #180: C9       | x, y, z     | O15     | x, 0.5-y, -0.5+z      | 2.9758(1)    | 105.1     |
| #156: O37      | x, y, z     | C35     | x, 1+y, z             | 3.0963(1)    | 121.6     |
| Compound 2     |             |         |                       |              |           |
| #102: O23      | x, y, z     | C1      | x, y, z               | 2.9984(8)    | 117.8     |
| #103: O23      | x, y, z     | C38     | x, y, z               | 2.7155(9)    | 99.0      |
| #104: O24      | x, y, z     | C22     | x, y, z               | 3.0393(9)    | 114.1     |
| #105: O24      | x, y, z     | C40     | x, y, z               | 2.8063(10)   | 96.7      |
| #107: C20      | x, y, z     | O14     | 1-x, 1-y, -z          | 3.0394(10)   | 135.6     |
| #109: C34      | x, y, z     | OW2     | -1+x, y, z            | 3.1947(12)   | 97.3      |
| Compound 3     |             |         |                       |              |           |
| #109: O41      | x, y, z     | C1      | x, y, z               | 3.0524(5)    | 113.8     |
| #110: O43      | x, y, z     | C10     | x, y, z               | 2.9544(5)    | 115.8     |
| #111: C4       | x, y, z     | O14     | 2-x, 2-y, -1-z        | 3.1051(7)    | 114.8     |
| #114: C20      | x, y, z     | O8      | 0.5+x, 2.5-y, -0.5+z  | 3.1406(4)    | 91.2      |
| #115: C18      | x, y, z     | O7      | 1.5-x, -0.5+y, -1.5-z | 3.0212(5)    | 94.4      |
| Compound 4     |             |         |                       |              |           |
| #79: O24       | x, y, z     | C22     | x, y, z               | 3.0514(9)    | 113.7     |
| #80: O24       | x, y, z     | C29     | x, y, z               | 2.7972(10)   | 96.6      |
| #81: O23       | x, y, z     | C26     | x, y, z               | 2.7144(10)   | 98.8      |
| #82: O23       | x, y, z     | C10     | x, y, z               | 3.0098(8)    | 111.1     |
| #83: C22       | x, y, z     | O12     | 2-x, 1-y, -z          | 3.0883(10)   | 133.1     |
| #84: C14       | x, y, z     | O11     | 1+x, y, 1+z           | 3.0636(7)    | 109.9     |
| #85: C1        | x, y, z     | O119    | 1+x, y, 1+z           | 3.1718(12)   | 124.1     |
| #87: C27       | x, y, z     | O14     | 2-x, -y, -z           | 3.1982(11)   | 103.1     |
| #88: C5        | x, y, z     | O10     | 2-x, -y, 1-z          | 3.0978(8)    | 124.7     |
| #89: C2        | x, y, z     | O119    | 1+x, y, 1+z           | 3.1773(11)   | 122.8     |
